# Supplementary material
Source: PubMed Central journal article supplement (PMC7091475)
Supplement: jamapediatr-174-470-s001.pdf [file jamapediatr-174-470-s001.pdf]

## Supplementary Online Content

Fontanella CA, Warner LA, Steelesmith D, Bridge JA, Sweeney HA, Campo JV. Clinical profiles and health services patterns of Medicaid-enrolled youths who died by suicide. *JAMA Pediatr*. Published online March 23, 2020. doi:10.1001/jamapediatrics.2020.0002

### **eTable.** Matching Characteristics Between Cases and Controls

This supplementary material has been provided by the authors to give readers additional information about their work.

**eTable. Matching Characteristics Between Cases and Controls**

|                                               | ALL<br>(N = 7,256) | Suicide cases<br>(N = 910) | Controls<br>(N = 6,346) |                |    |         |
|-----------------------------------------------|--------------------|----------------------------|-------------------------|----------------|----|---------|
|                                               | n(%)               | n(%)                       | n(%)                    | X <sup>2</sup> | df | p-value |
| Age group                                     |                    |                            |                         | .32            | 1  | .57     |
| 10-14 years                                   | 1882 (25.9)        | 229 (25.2)                 | 1653 (26.1)             |                |    |         |
| 15-18 years                                   | 5374 (74.1)        | 681 (74.8)                 | 4693 (74.0)             |                |    |         |
| Male                                          | 5292 (72.9)        | 657 (72.2)                 | 4635 (73.0)             | .28            | 1  | .59     |
| Race-ethnicity                                |                    |                            |                         | 1.54           | 3  | .67     |
| Non-Hispanic white                            | 3619 (49.9)        | 449 (49.3)                 | 3170 (50.0)             |                |    |         |
| Non-Hispanic black                            | 1408 (19.4)        | 167 (18.4)                 | 1241 (19.6)             |                |    |         |
| Hispanic                                      | 1253 (17.3)        | 164 (18.0)                 | 1089 (17.2)             |                |    |         |
| Other                                         | 976 (13.5)         | 130 (14.3)                 | 846 (13.3)              |                |    |         |
| Medicaid eligibility<br>category <sup>a</sup> |                    |                            |                         | 8.93           | 2  | .01     |
| Poverty                                       | 5688 (78.4)        | 748 (82.2)                 | 4940 (77.8)             |                |    |         |
| Foster care                                   | 832 (11.5)         | 85 (9.3)                   | 747 (11.8)              |                |    |         |
| Disability                                    | 736 (10.1)         | 77 (8.5)                   | 659 (10.4)              |                |    |         |
| State                                         |                    |                            |                         | 5.79           | 15 | .98     |
| CA                                            | 1138 (15.7)        | 152 (16.7)                 | 986 (15.5)              |                |    |         |
| FL                                            | 395 (5.4)          | 51 (5.6)                   | 344 (5.4)               |                |    |         |
| GA                                            | 225 (3.1)          | 34 (3.7)                   | 191 (3.0)               |                |    |         |
| IL                                            | 512 (7.1)          | 60 (6.6)                   | 452 (7.1)               |                |    |         |
| IN                                            | 448 (6.2)          | 54 (5.9)                   | 394 (6.2)               |                |    |         |
| MA                                            | 142 (2.0)          | 18 (2.0)                   | 124 (2.0)               |                |    |         |
| MI                                            | 804 (11.1)         | 99 (10.9)                  | 705 (11.1)              |                |    |         |
| MN                                            | 361 (5.0)          | 43 (4.7)                   | 318 (5.0)               |                |    |         |
| NC                                            | 274 (3.8)          | 35 (3.9)                   | 239 (3.8)               |                |    |         |
| NY                                            | 283 (3.9)          | 33 (3.6)                   | 250 (3.9)               |                |    |         |
| OH                                            | 918 (12.7)         | 103 (11.3)                 | 815 (12.8)              |                |    |         |
| OR                                            | 192 (2.7)          | 27 (3.0)                   | 165 (2.6)               |                |    |         |
| TX                                            | 664 (9.2)          | 91 (10.0)                  | 573 (9.0)               |                |    |         |
| VA                                            | 209 (2.9)          | 26 (2.9)                   | 183 (2.9)               |                |    |         |
| WA                                            | 456 (6.3)          | 54 (5.9)                   | 402 (6.3)               |                |    |         |
| WI                                            | 235 (3.2)          | 30 (3.3)                   | 205 (3.2)               |                |    |         |
| Enrollment year                               |                    |                            |                         | .30            | 4  | .99     |
| 2009                                          | 1298 (17.9)        | 165 (18.1)                 | 1133 (17.9)             |                |    |         |
| 2010                                          | 1378 (19.0)        | 171 (18.8)                 | 1207 (19.0)             |                |    |         |
| 2011                                          | 1602 (22.1)        | 205 (22.5)                 | 1397 (22.0)             |                |    |         |
| 2012                                          | 1771 (24.4)        | 222 (24.4)                 | 1549 (24.4)             |                |    |         |
| 2013                                          | 1207 (16.6)        | 147 (16.2)                 | 1060 (16.7)             |                |    |         |

<sup>a</sup> Differences in eligibility were observed but deemed to be minimal, with slight bias toward the control group for foster care and disability due to the continuous enrollment criteria (i.e. controls were easier to match to suicide decedents in these groups).
